# Supplementary material for: Forensic Linguistic Analysis of Language Crimes in Sociological Context: Solicitation, Threatening, and Conspiracy - the Mustafa Case
Source: Research Square preprint supplement (doi:10.21203/rs.3.rs-6214397/v1), 2025-05-07
Supplement: Supplementary file 1 [file c18890e27259bbc38f7352fd.docx]

**SUPPLEMENTARY FILE: Transcript of Interrogation**

**Case:** The Murder of Suzan Tamim
**Date:** September 1, 2008 (and continued September 2, 2008)
**Location:** High Court of Justice, Cairo, Egypt
**Interrogating Authority:** Public Prosecution
**Subject:** Hesham Talaat Moustafa (HTM)
**Present:** HTM, Legal Representatives (later identified as Farid El-Deeb)

**(Transcript begins - September 1, 2008, 9:59 PM)**

**Prosecution (P):** (Preliminary formalities and introduction) The subject, Hesham Talaat Moustafa, appeared before the court wearing a dark-colored suit. The record describes him as a man in his mid-life, tall, wheat-complexioned, with a mustache and white hair. The prosecution informed HTM of the charges, which he denied. He was asked if he had legal representation, to which he replied, "Professor Farid El-Deeb."

**P:** State your full name, age, occupation, residence, and national ID number.

**HTM:** My name is Hesham Talaat Moustafa Ibrahim, 49 years old, Chairman of the Board of Directors of Talaat Moustafa Group Holding Company, and a member of the Shura Council. I reside at 32 Alfred Lian Street in Alexandria and 1 Saleh Ayoub Street in Zamalek - Qasr al-Nil. My national ID card number is 25912190201493.

**P:** What is your statement regarding the accusation that you participated with the accused, Mohsen Al-Sukkari, in inciting, agreeing, and assisting in the murder of the victim, Suzan Abdel Sattar Tamim, intentionally, with premeditation and stalking?

**HTM:** Of course, this accusation has no basis in truth.

**P:** What is your specific relationship with the victim?

**HTM:** The victim had come to Egypt, and I met her in August 2004 through one of my Arab friends. She had some problems, and she asked me to help her solve those problems. I helped her, our relationship deepened, and I considered becoming engaged to her in July or August 2006. Then, I changed my mind about this, and she left the country in November 2006. My relationship with her was virtually cut off after that, and my relationship with her ended.

**P:** When did your relationship with the victim specifically begin?

**HTM:** I met her in August 2004.

**P:** How did that relationship begin?

**HTM:** At one of the Rotana parties at the Four Seasons Hotel in Sharm El-Sheikh. Dr. Jihad Awkal, the private physician of Prince Walid bin Talal, introduced me to the victim. He asked me to help her if she needed assistance because she was in Egypt, she was Lebanese, and she didn't know anyone in the country.

**P:** What was the nature of the assistance that the aforementioned individual referred to?

**HTM:** He stated to me that she was suffering from problems with a person named Adel Maatouk, who claimed to be her husband, and he asked me to help her if she needed anything.

**P:** And when did the victim come to the country specifically?

**HTM:** I don't know. That was the first time I met the victim, and I hadn't heard of her before.

**P:** What was the nature and scope of the assistance you provided to the aforementioned?

**HTM:** She was suffering from legal problems with Interpol and was being pursued by the aforementioned Adel Maatouk. I sent employees from my company to inform the Lebanese consulate and assist her in contacting Interpol, to find out the reason for her detention, through her lawyer. I also learned from her by telephone that Adel Maatouk had broken into her birthday party at the Semiramis Hotel and assaulted her. As a result of these circumstances, I allowed her, as a form of humanitarian assistance, to stay in a suite at the Four Seasons Hotel in Cairo for six or seven months at my own expense, along with her mother, Mrs. Thuraya Al-Zarif.

**P:** To what extent did your relationship with the victim reach?

**HTM:** It reached the point where I considered becoming engaged to her in July or August 2006, and I presented the matter to my mother, but she refused, and therefore I abandoned this idea.

**P:** What was the time period that this relationship lasted?

**HTM:** About two years or two years and two months, from August/September 2004 until November 2006.

**P:** And how did it end?

**HTM:** My relationship with the victim ended due to the failure of the engagement proposal and her traveling abroad.

**P:** And did any disputes arise between you during the aforementioned period?

**HTM:** There were no disputes.

**P:** And how did the victim leave Egypt after that?

**HTM:** She traveled in November 2006, and I don't know why she traveled, but it was at a time coinciding with the end of our relationship.

**P:** And where did she go?

**HTM:** My information is that after she left Egypt on the date I mentioned, she went to Dubai and stayed there for a few days, then she traveled to London. I don't know the details of what happened in London exactly.

**P:** And how did you learn this information?

**HTM:** Through telephone calls between us, which continued for two or three months after she traveled, and then stopped.

**P:** And what were the limits of your relationship with the victim after she left the country?

**HTM:** The limits of the relationship were through telephone calls, and she often asked me for financial assistance. I provided her with assistance while she was in Egypt, and after she traveled, I don't remember whether I transferred money to her or not.

**P:** And with whom did the victim stay in London?

**HTM:** I don't know the details of her stay in London.

**P:** And when did she move to Dubai after that?

**HTM:** I don't know. My relationship with her was virtually cut off after she left Egypt, after the two months I mentioned.

**P:** When and how did you learn of the victim's murder?

**HTM:** I learned of her murder on 7/29/2008 through a phone call from a mutual friend of mine and hers, named Samir Safeer. He is a Lebanese composer, and he called me from Lebanon and said, "Have you heard the latest news?" I said, "What is it?" He said, "Suzan was found murdered in Dubai." He didn't tell me the details, and I was shocked by this news, and I kept repeating the phrase, "There is no power or strength except with God Almighty."

**P:** What did you do after receiving this news?

**HTM:** I contacted her father, Abdel Sattar Tamim. There was continuous contact between us, and it was friendly, because he has a son named Khalil, who is the victim's brother, and the boy would turn to me if he needed anything. I offered my condolences to her father and offered to provide any assistance he needed.

**P:** And what did you learn about the circumstances of this incident?

**HTM:** What I learned was through newspapers and some news published on the Internet, that she was killed in her apartment in Dubai, and I mean in an apartment in Dubai, and I learned the rest of the details through the memorandum sent to the Shura Council to take legal action.

**P:** And what is your explanation for the victim's murder in this manner?

**HTM:** I have no explanation for that.

**P:** And what is your connection to the accused, Mohsen Mounir Al-Sukkari?

**HTM:** There is no special relationship, only a working relationship, by virtue of the fact that he was the security director of the Four Seasons Hotel in Sharm El-Sheikh, and I am a partner in this hotel.

**P:** And when did your relationship with the aforementioned begin?

**HTM:** At the time of the hotel's opening in early 2002.

**P:** What are the limits of your relationship with the latter?

**HTM:** A working relationship only. He used to tell me that there was a personality like Walid bin Talal and other important personalities, and he used to contact me frequently to present the work he was doing, but within the limits of hotel work, especially the personalities who come to stay at the hotel.

**P:** What was the period of time that the aforementioned worked at the Four Seasons Hotel in Sharm El-Sheikh?

**HTM:** I don't have the exact dates in mind, but I believe he stayed for two years.

**P:** What was the reason for his leaving work?

**HTM:** I don't know, but the appointment of employees below the general manager is the responsibility of the hotel management, and sometimes, out of courtesy, they present to me the occupants of influential positions in the hotel, such as the financial manager, the food and beverage manager, the room service manager, or the security director.

**P:** What is your statement regarding what is established in the records of gathering inferences and the investigations of the Public Prosecution in Dubai, that the victim's body was found in her apartment in Burj Al Rimal, Dubai, murdered on 7/28/2008?

**HTM:** I had no idea about the circumstances of this incident until I reviewed the prosecution's investigations through the defense and by reviewing the memorandum sent to the Shura Council.

**P:** And what is your statement regarding the conclusion of the investigations that the accused, Mohsen Mounir Al-Sukkari, committed this crime using a knife?

**HTM:** I have no background on the details, and I don't know if Mohsen killed her or not.

**(Note: At this point, the prosecution presents surveillance camera images from the scene of the crime to HTM.)**

**P:** To whom do these images, which are now shown to you, belong?

**HTM:** Due to the lack of clarity of the face, I cannot be certain of the identity of the person in the images, but some of them resemble Mohsen Al-Sukkari's body.

**P:** What is your statement regarding what Abdel Sattar Tamim stated in the record of gathering inferences with the Dubai Police, that disputes occurred between you and the victim because of her refusal to be engaged to you?

**HTM:** That didn't happen. The circumstances of my proposal to her came while I and my family were performing Umrah. I invited her, her father, her mother, her brother, and her grandmother, and I presented the matter to my mother, and she refused completely. The refusal was from my mother's side, not from her side. Suzan was welcoming and ready for it, and I have witnesses to this matter.

**P:** What is your statement regarding what the aforementioned also stated, that he tried to return her to Egypt at your request, and that you sent her a private plane for this purpose?

**HTM:** This is not true. However, I learned that she tried to enter Egypt in April 2007, but she was prevented from entering by the Egyptian authorities and returned.

**P:** What is your statement regarding what the aforementioned also stated, that after she was refused entry to the country, according to what he stated, she cut off her relationship with you, and changed her phone numbers and her address?

**HTM:** I don't know the validity of this statement, because there was no contact between us two or three months after she left Egypt.

**P:** What is your statement regarding what he also stated, that you sent him with your brother, Tarek, to try to reconcile with the victim, but she refused?

**HTM:** My brother Tarek's going to London was at the request of her father, in an attempt to address her inappropriate behavior, which she committed and which reached me through acquaintances and friends. By this behavior, I mean that she and Riyad Al-Ghazawi reported to the London police that I was trying to contact her and that she wanted to prevent me from approaching her.

**P:** What is your statement regarding what the aforementioned also stated, that threats were made to the victim during her stay in London, and that there were lawsuits before the police stations there?

**HTM:** There is one report filed by the victim and Riyad Al-Hamzawi to the British police, and the police acknowledged, according to the letter sent to me, that these were false allegations, and they did not summon me for questioning, and I will provide evidence of that.

**P:** What is your statement regarding what the aforementioned stated, that you sent her mother and her lawyer, Clara, for the same purpose?

**Defense Appeal Arguments**

**Case:** The Murder of Suzan Tamim
**Court:** Court of Cassation (Egypt)
**Date:** (Filed shortly before the 60-day deadline following the June 25th, 2009 verdict)
**Appellant:** Hesham Talaat Moustafa (HTM)
**Representing Counsel:** Bahaa El-Din Abu Shoka and Dr. Mohamed Abu Shoka
**Respondents:** Public Prosecution, Abdel Sattar Khalil Tamim, and Civil Claimants

**I. Introduction**

This memorandum of appeal contests the death sentence issued against Hesham Talaat Moustafa in the case of the murder of Lebanese singer Suzan Tamim. The defense challenges the verdict on multiple grounds, including insufficiency of evidence, flawed reasoning, misapplication of law, and violation of due process.

**II. Parties Contested**

The defense contested all of: Public Prosecution, Abdel Sattar Khalil Tamim, and Civil Claimants.

**III. Basis of the Appeal**

The appeal is based on 27 (and later expanded to 30, and then by another lawyer, Farid El-Deeb to 41) principal grounds, categorized as follows:

- **Insufficiency of Evidence:** The court's reasoning lacked sufficient detail and failed to adequately address key pieces of evidence.
- **Flawed Reasoning:** The court's justifications for its conclusions were insufficient, illogical, and contradictory.
- **Misapplication of Law:** The court incorrectly interpreted and applied relevant legal principles and procedural rules.
- **Inconsistency of witness statements**
- **Violation of the right of defense**

**IV. Procedural Background**

- **Verdict Date:** June 25, 2009
- **Issuing Court:** Third Circuit, presided over by Judge Mohammedi Qanswa
- **Court Rationale:** Issued on the last permissible day (30 days after the verdict), totaling 203 pages.
- **Appeal Deadline:** 60 days from the verdict date. This appeal was filed within 48 hours of the deadline.

**V. Summary of the Prosecution's Case**

The prosecution charged Mohsen Mounir Ali Hamdi Al-Sukkari with committing the murder of Suzan Tamim outside Egyptian territory and with illegal possession of weapons and ammunition. Hesham Talaat Moustafa was charged with participating in the murder through agreement, incitement, and assistance, allegedly hiring Al-Sukkari for two million dollars in revenge.

**VI. Detailed Grounds for Appeal**

The appeal memorandum, comprising 348 pages, details 27 (later expanded) specific grounds for appeal. These grounds are summarized below:

**1. Insufficiency of Evidence Regarding Witness Statements and Judicial Assistance:**

- The court relied on written and signed statements from the victim's parents (Abdel Sattar Tamim and Thuraya Al-Zarif) and brother in the Dubai investigations, as well as judicial assistance provided by the Lebanese authorities in Beirut (questioning of Tamim's family).
- The court's judgment, however, failed to adequately detail the *content* of these statements and testimonies. It did not provide a sufficient summary of the evidence derived from Abdel Sattar Khalil Tamim's testimony in Dubai and Beirut, despite explicitly relying on this evidence.
- This lack of detail prevents the Court of Cassation from properly reviewing the evidence and assessing its relevance and consistency with other evidence. A conviction must clearly state the evidence and its *content*, not just refer to it.

**2. Insufficiency of Evidence Regarding Testimony of Officer Sameh Mohamed Selim:**

- The court relied on the testimony of Officer Sameh Mohamed Selim, his report, and the video/photo evidence he presented (extracted from surveillance cameras at the Waha and Hilton hotels, and the Rimal 1 building on July 24, 25, and 28, 2008).
- While the court summarized Selim's testimony and the court's viewing of the video/photo evidence, it failed to adequately detail the *content* of Selim's *report*. This omission is crucial because the court relied on the report as part of its evidence against HTM.
- This omission prevents the Court of Cassation from reviewing the report's content and assessing its consistency with other evidence.

**3. Misapplication of Law in the Attribution of Evidence (Testimony of Officer Sameh Mohamed Selim):**

- The judgment incorrectly attributes statements and conclusions to Officer Sameh Mohamed Selim, misrepresenting the evidence presented in court.
- This misattribution is particularly significant regarding the images from July 28, 2008 (the day of the murder), impacting the court's interpretation of the timing of events.
- This error undermines the court's reasoning and conclusions, as it is unclear what the court's judgment would have been had it correctly understood Selim's testimony.

**4. Misapplication of Law in the Attribution of Evidence (Testimony of May Diaz Subirano):**

- The court incorrectly summarized the testimony of May Diaz Subirano, a saleswoman at "Sun & Sand Sports." The court claimed she testified that Al-Sukkari purchased a Nike tracksuit and shoes on July 27, 2008, at approximately 9:37 PM, using a credit card, and that the seized items matched those purchased. The court believed that the bag is the same one Al-Sukkary was holding.
- This is a misrepresentation, as the sales woman's testimony was misinterpreted.
- This constitutes a mis-belief of the court.

**5. Misapplication of Law in the Attribution of Evidence (Testimony of General Ahmed Salem Al-Naghi):**

- The court incorrectly summarized and misrepresented the testimony of General Ahmed Salem Al-Naghi, who prepared the investigation report. This misrepresentation influenced the court's reasoning and conclusions.
- The court interfered with the witness's account.

**6. Misapplication of Law in the Attribution of Evidence (Testimony of Officer Samir Saad Mohamed):**

- The court incorrectly attributed an admission of guilt to Al-Sukkari, based on the testimony of Officer Samir Saad Mohamed, who apprehended Al-Sukkari. The court claimed Al-Sukkari confessed to the details of the murder.
- This is a misrepresentation of the evidence, as the transcript does not contain such a detailed confession.

**7. Further Misapplication of Law in the Attribution of Evidence (Testimony of Officer Samir Saad Mohamed):**

- The court further misrepresented Officer Samir Saad Mohamed's testimony regarding Al-Sukkari's alleged description of the clothes he wore during the crime and how he disposed of them.
- This misrepresentation creates an inaccurate picture of Al-Sukkari's alleged actions and statements.

**8. Misapplication of Law Regarding Assistance in Obtaining a Dubai Visa:**

- The court incorrectly concluded that HTM assisted Al-Sukkari in obtaining a visa to Dubai, based on the fact that a company connected to HTM sponsored the visa application.
- The court used this as evidence of HTM's involvement in the crime, misinterpreting the significance of the visa sponsorship.

**9. Misapplication of Law in the Attribution of Evidence (Testimony of Clara Elias):**

- The court incorrectly summarized the testimony of Clara Elias, Suzan Tamim's lawyer, claiming she stated that Tamim had received death threats from HTM. The court omitted crucial parts of her testimony, changing its meaning.
- This misrepresentation distorts the evidence and undermines the court's reasoning.

**10. Misapplication of Law in the Attribution of Evidence (Testimony of Ahmed Magid Ali Ibrahim):**

- The court incorrectly linked a bank deposit made by Ahmed Magid Ali Ibrahim (an accountant at a Talaat Moustafa Group company) into Al-Sukkari's account with a text message sent by Al-Sukkari to HTM requesting money.
- The court erred when it believed that Ahmed Magid's testimony stated that delivery took place on May 29th.

**11. Further Misapplication of Law in the Attribution of Evidence (Testimony of Clara Elias)**

The court continued to incorrectly summarize the testimony.

**12. Misapplication of Law in the Attribution of Evidence (Testimony of Captain Issa Saeed):**

- The court misrepresented the testimony of Captain Issa Saeed, a Dubai police officer, claiming he definitively identified Al-Sukkari in the surveillance images. The officer's testimony was less certain, expressing some doubt.

**13 - 14. (Omitted in the provided text - likely similar arguments about misattribution of evidence)**

**15. Violation of the Egypt-UAE Judicial Cooperation Agreement (Article 41):**

- The court violated Article 41 of the Judicial Cooperation Agreement between Egypt and the UAE, which states that neither country will extradite its citizens. The article requires that the country where the crime occurred request prosecution before the other country takes action.
- This violation constitutes a procedural error that undermines the legitimacy of the proceedings.

**16. Contradictory Reasoning, Flawed Application of Law, and Flawed Reasoning (Regarding Investigation Procedures):**

- The defense argued that the initial investigation procedures, including Al-Sukkari's first interrogation, were invalid because there was no official order assigning the investigation.
- The defense also argued that, as an Egyptian citizen, Al-Sukkari could not be extradited, citing Article 51 of the Egyptian Constitution and Article 41 of the Egypt-UAE agreement.

**17. Contradictory Reasoning, Flawed Application of Law, and Flawed Reasoning (Regarding Arrest of Al-Sukkari):**

- The defense argued that Al-Sukkari's arrest was illegal because it was carried out without a warrant from the Egyptian Public Prosecution, without being caught in the act (in flagrante delicto), and without a proper arrest warrant from the competent authorities in Dubai, as required by the agreement.
- This invalidates all subsequent evidence and procedures stemming from the illegal arrest.

**18. Flawed Reasoning and Flawed Application of Law (Regarding Interrogation of Al-Sukkari):**

- The defense argued that Al-Sukkari's interrogation was invalid because it was conducted without the presence of a lawyer, despite him being accused of a capital offense (premeditated murder), violating Article 124 of the Egyptian Criminal Procedure Code.

**19. Flawed Reasoning and Flawed Application of Law (Regarding Expert Witnesses):**

The defense argued that the reports and testimonies of expert witnesses (not from the Ministry of Justice or the Forensic Medicine Authority) were invalid because they were not sworn in, as required by law.

**20. Flawed Reasoning, Flawed Application of Law, and Flawed Reasoning (Regarding Investigation Procedures and HTM's Travel Ban):**

The defense argued that all investigation procedures conducted by the Public Prosecutor's Office in Egypt, including the travel ban imposed on HTM, were invalid because they violated HTM's parliamentary immunity as a member of the Shura Council (referencing the relevant articles of the Egyptian Constitution and Criminal Procedure Code). These actions required prior authorization from the Shura Council or its president.

**21. Flawed Reasoning and Violation of the Right of Defense (Regarding the Impossibility of the Crime as Described):**

- The defense argued that the crime, as described by the prosecution and accepted by the court, was physically impossible based on forensic evidence (crime scene analysis, autopsy reports, and the presence of other people's fingerprints).
- The court ignored this.

**22. Flawed Reasoning and Violation of the Right of Defense (Regarding the Illegality of the Recorded Calls):**

- The defense argued that the five recorded phone calls between HTM and Al-Sukkari were inadmissible as evidence because they were obtained illegally, without proper authorization (referencing the relevant article of the Egyptian Criminal Procedure Code).

**23. Contradictory and Flawed Reasoning (Regarding the Court's Rejection of the Recorded Calls):**

The court claimed it did not rely on the content of the recorded calls as evidence, yet it also referred to the calls and messages as evidence of communication between HTM and Al-Sukkari. This is a contradiction.

**24. Flawed Reasoning and Arbitrary Conclusion (Regarding Testimony of Officer Samir Saad Mohamed):**

The defense argued that the testimony of Officer Samir Saad Mohamed, a key witness for the prosecution, was inadmissible and illogical.

**25. Contradictory and Flawed Reasoning (Regarding the Court's Description of the Crime Scene):**

The court's description of how Al-Sukkari allegedly gained entry to Tamim's apartment and attacked her is inconsistent with the physical evidence and illogical.

**26. Flawed Reasoning (Regarding HTM's Participation):**

The court's conclusion that HTM participated in the crime through incitement, agreement, and assistance is based on flawed reasoning and insufficient evidence.

**27. Flawed Reasoning (Regarding HTM's Responsibility):**

The court's conclusion about HTM's participation.

**28. Flawed Reasoning (Regarding The testimony of Dr. Farida Al-Hajj Muhammad Hussein Al-Shamali):**

The court's flawed conclusion.

**29. Flawed Reasoning (civil compensation):**

The court's flawed ruling about monetary compensation.

**30. Flawed Reasoning (defense documents):**

The present defense counsel with Mohsen Al-Sukkari submitted an addendum to his oral arguments, and in support of what he raised in them, eight portfolios of “documents” were included, the implications of which were emphasized and what was recorded on their pages in support of his defense and in denial of the charge,

And that the contested judgment, if it were presented to those portfolios and the documents they contained, was limited to mentioning the first five portfolios and presenting their contents in detail, then it presented the seventh portfolio, which includes a technical report submitted by Engineer Walid Farouk Youssef Al-Baroni, an expert in computer science for the camera system, then the contested judgment presented the eighth portfolio containing a report. A consultancy prepared by Dr. Ayman Fouda, which includes the appeal against the forensic report submitted in the case and the aspects of the objections to it.
**31. (added later): Flawed Reasoning (Requests to hear Al-Sukkari's defense):**

And in the last reason, there was a violation of the right to defense, in that the defense of Mohsen Al-Sukkari insisted in concluding his argument with two definitive, precautionary requests, unless the court concludes with an acquittal in its ruling.
**VII. Relief Requested**

The defense requests the following:

1. **Formally:** Acceptance of the appeal.
2. **Substantively:**
   - **Originally:** Quashing of the appealed judgment and a ruling of inadmissibility of the criminal case due to its filing in violation of Article 141 of the Egypt-UAE Judicial Cooperation Agreement and in violation of Article 99 of the Constitution and Article 9 of the Criminal Procedure Code.
   - **Alternatively:** Quashing of the appealed judgment and referral of the case to a different circuit court for retrial.

**I. Recorded Calls Between Mohsen Al-Sukkari and an Unidentified Person (Presumably Hesham Talaat Moustafa - HTM)**

These calls are presented as evidence by the prosecution, allegedly recorded by Al-Sukkari. The "unidentified person" is strongly implied to be HTM, though he denies it in his testimony.

**Call 1: Wednesday, June 25, 2008**

- **Unidentified Person (UP):** Hello Mohsen, how are you?
- **Mohsen (M):** Hello, Sir. How are you? How are things?
- **UP:** You didn't call me. You were supposed to come on Wednesday. You said you'd come on Wednesday.
- **M:** I told you Wednesday or Thursday. Of course, I'm collecting the 20%. I'm supposed to have the 20% transferred to me, the one that was paid for London. They sent me the pictures and they sent me things about Dubai, and I told them the operation is closed, and to forget the whole thing. I have nothing to do with Dubai or not Dubai. They said that when I was in London, I wanted to confirm the address.

The reason for her disappearance now...she and they are staying at the house at 22 Al Rimal Beach...Al Rimal...and they sent someone three days ago to photograph them there and photograph the location, and they sent me the pictures. I told them also the operation is closed because she's leaving the country and traveling and doing...

This is not my responsibility. Send me the 20%, and this 20% they will send me, plus the rest of the money I have, I'm keeping it. I'll bring it and come to you right away. They said, "We are not to blame now." I told them, "There's no such thing as 'we are not to blame.'" The 'paste off' is already client...and closed and the operation is not anymore...

They said, "Even if it's in Dubai?" I told them, "I don't care. Dubai or anything." And our fatigue...they made a call. She and they are in Dubai, and the boy is training there at a club called Al-Dramliya, and they've been there for a month. He's been there for a month, and she's been there for more than 15 days, living with him there. I already pulled them from the operation.

And I said the 20% that you took as an advance for the accident...they said, "Okay, no problem. But we're also sending you pictures. Look at them so you know that we're also not to blame and understand your client." I told them, "My client has closed it already, forget the case. And we want our cash." But in exactly, today or tomorrow, they will make a transfer for the money.

- **UP:** The important thing is that you come to me, because I want to know the calculations for these things. I want to look at them with you.
- **M:** I have the whole file. Should I come to you tomorrow or Friday?
- **UP:** I'm in Cairo tomorrow.
- **M:** You're available on Friday...so I'll come to you on Friday, away from the office.
- **UP:** No...Friday I'm in Alexandria, not in Cairo. I'm available tomorrow and I'm available Saturday in Cairo if you want to come to me on Saturday.
- **M:** Okay, I'll come to you on Saturday so that everything is ready.
- **UP:** God willing.
- **M:** Okay, Sir. Goodbye.

**Call 2: Wednesday, June 25, 2008 (Duration: 4 minutes 30 seconds)**

- **M:** Hello.
- **UP:** Hello Mohsen, I'm telling you...those guys, the useless ones of yours, the ones from London, what are they saying? How did they say they reached her in Dubai?
- **M:** Look, Sir, so you know the story... There, there's a 15-day time gap that we lost.
- **UP:** How did you lose them when you were tailing her?
- **M:** We lost them because of me. Because they were telling me, "We'll put 24-hour surveillance." I found them calculating by the hour, and I don't want to get into costs and then it becomes bullshit.

I told them, "No...at the times when she's settled in the house, leave and lift the surveillance because we don't want a high cost." We lost track of her from the last day she came out of an office called Dean and Dean, a lawyer's office. I was even present with them in a car on the street. She and a friend of hers went to Hyde Park for a walk.

They entered Hyde Park from a place...they didn't know...there are no cars there...a place all for sports and people jogging with dogs and stuff. They went out from another gate on the side of Sloane Street, they weren't picked up. From that day, they were cut off. And I stayed put. They came and said, "Now we have a trace...the boy is in Dubai and she's leaving from Gatwick Airport, an airport called Gatwick."

There's a reservation for her, and flights, and stuff, and a possibility she'll travel to Dubai. I told them, "Before she leaves Dubai, I want the meeting to be carried out on her." That was the period that was cut off, they kept telling me "most probably." I told them, "No, let's stay away." I came back so I wouldn't bear the cost.

They called me after you contacted me that day, and I called them and told them to close the accounts. They told me, "There are two of ours there in Dubai who won't leave until they photograph the place and photograph her and make sure she's there."

They gave me this confirmation exactly 48 hours ago...three days ago at dawn. They said she was getting out of an Avis car, she and Riyad, and they were staying in this house, in apartment number such-and-such, and the address, they gave it to me completely. It's called Jumeirah Rimal Beach...a place with accommodations. She's staying on the 22nd floor in apartment 088, something... I have the number, and they're both staying there and renting a car with a driver from Avis. And the boy, with his movements...

She's staying at the house...his movements, he goes down, he goes to an area there, something like sports, he probably has work there or a contract or something, while they're keeping an eye on the living situation. That's it. And other investigations too, that we had from there...from London...from people who used to work...the move we made that made her cut off Dubai, because of me also...that I made them make a reservation at her spa.

And we called her as if we were the spa, so she would come...we wanted her to come down. I want the matter to be finished as soon as possible. They're now settling them in Dubai. They're telling me, "You, the operator, closed the client."

I told them, "I want 20%, and I'm returning everything to the client, and it's over, the case is closed." They said, "We sent a crew after her to Dubai, if there's an opportunity, we'll carry it out in Dubai...even on both of them." I said no also, to your client.

- **UP**: If there is a commitment of specific timing during which they will execute the operation, they may execute it.
- **M**: They said that there is a crew after them now in Dubai.
- **UP:** Look...look...look, the best solution for this matter is like the prototype of Ashraf's in London.
- **M:** Exactly.
- **UP:** Which is...from...uh...you know...from above and pushed right away.
- **M:** And there it's easier. London, Sir...I saw the street they cross...people are respectful...
- **UP:** Come to me on Saturday and I'll arrange with you...we'll talk...no talking on the phone. Talk to them...open the topic, but with two conditions: a fixed amount and a specific date, the end of such-and-such...but I have nothing more to say than that. Give them a maximum, for example, one week or ten days...and with a fixed amount.
- **M:** Okay.
- **UP:** The matter is closed.
- **M:** Okay.
- **UP:** Okay, thank you.

**Call 3: Wednesday, July 2, 2008 (Duration: 2 minutes 7 seconds)**

- **M:** Hello.
- **UP:** Hello Mohsen...hello.
- **M:** Yes, Sir, good evening.
- **UP:** Hello Mohsen, how are you?
- **M:** How are you, Sir? Fine.
- **UP:** Ah, fine.
- **M:** Fine, thank God. I was just informing you of the thing, the update...the update is moving almost...I mean, they went.
- **UP:** Ah.
- **M:** And they say it's very easy, the operation there is much easier than, of course, than the deal there. They will make it soon, and also as info, the boy bought an apartment in the same building too, of hers. And we also got everything, the copies of it and its story and its stuff, and supposedly pretty soon they'll carry out the deal, they'll carry out the meeting, I mean, but in a way, ah, like you were talking about.

The same idea, I mean.

- **UP:** Ah, which is the old idea.
- **M:** Ah, exactly, or there's an idea they gave me similar to it, also, it appears in the same way.
- **UP:** When are they expecting to finish?
- **M:** I mean, they said pretty soon...they're just moving.
- **UP:** Okay, the important thing is so they don't leave from there, you understand.
- **M:** No, they're staying, and the boy is preparing, he has a competition in ten days.
- **UP:** He has what?
- **M:** He has a competition in ten days in Dubai.
- **UP:** Okay...what did you agree on?
- **M:** I agreed...I told them the number. They said, "You paid us 20% of the number we asked for, which is the old one." So I actually...I'm talking to you, they had asked for the old number, one was five, the guy who will do the meeting will take it, and the other five are for them, because they were coming, one to carry out the meeting, so they told me...
- **UP:** What did you agree on now? I mean, huh...for how much?
- **M:** We...agreed on one...they want one...and twenty percent, they've taken them from the one.
- **UP:** Okay.
- **M:** I mean, 80% is what's left for them from the one...the one English...Sterling.

**Call 4: Wednesday, July 2, 2008 (Duration: 59 seconds)**

- **UP:** Hello, my dear.
- **M:** Yes, Sir.
- **UP:** The most important thing is that this matter doesn't take more than one week...I mean, Mohsen.
- **M:** Not...I mean, a lot from outside, and they told me, "Look, receive one call from us, the period that's coming, we don't want any calls...take from us the call that is deal done...message done done."
- **UP:** Okay.
- **M:** I told them, "I won't go into updates with you and what they did and what they didn't...opening, not...I don't know what...I told them, "I want this call done, and I'm giving you a time frame of such-and-such." So they told me, "We'll be finished before the time frame."
- **UP:** Okay.
- **M:** But they're furnishing the apartment, this...like this, they're preparing what they took, because they took one there.
- **M:** Okay.
- **UP:** In the same...on the floor below.
- **M:** Okay.
- **UP:** Okay, Sir, go ahead.
- **M:** Thank you.

**Call 5: Monday, July 28, 2008 (Duration: 33 seconds)**

- **M:** Hello.
- **UP:** Hello, handsome, how are you?
- **M:** Yes, Sir, how are you?
- **UP:** How are you doing?
- **M:** Fine, thank God.
- **UP:** Huh...any news?
- **M:** By tomorrow or the day after, maximum, Sir. Just give us tomorrow.
- **UP:** Okay.
- **M:** Okay, Sir, go ahead.
- **UP:** Thank you.
- **M:** You're welcome, Sir.

**II. Recorded Calls of Suzan Tamim (Content and Context)**

These calls, presented to the court, feature Suzan Tamim speaking to someone identified as Abdelkhalek Khoja, described as a close aide to Hesham Talaat Moustafa. The calls reveal Tamim's distress, her feeling of being monitored, and her claims about HTM's behavior.

**Call 1 (Suzan Tamim and Abdelkhalek Khoja):**

- **Abdelkhalek (AK):** Leave the matter until tomorrow, and then so you can think about what you want or what's on your mind. But I can't say if that...
- **Suzan (S):** Ya Dudu (nickname), I don't want anything from him anymore... I don't want anything from him... I've had enough of what I've gotten from him... I've had enough of what I've seen.
- **AK:** Will you listen to me...?
- **S:** Not everything is by force... I'm waiting... And I'll also say what I have... And I'll say why he did this... And I'll say what this is and what that is. You don't give me something and in the end tell me, "Come and get it." Don't give it in the first place... Don't come and beg and beg and beg, and in the end come and tell me, "Hahaha, you'll do what I want or hahaha."
- **AK:** Uh-huh.
- **S:** And then the guards sitting watching me, going up and down?... I, Sir, watch me... I don't do anything wrong... And what I do in secret, I do in public... Watch me as much as you want, but people don't have to put up with this... This is considered rude to people.
- **AK:** I know... Uh-huh.
- **S:** A report on going out and a report on coming in... A report... I swear to God, he's imprisoning me, Ya Dudu... I swear to God, and I'm complaining... I swear to God, I can't talk to anyone anymore... And I can't go out or sit or call... And no one comes to my house anymore... And I'm sitting, imprisoning myself 24 hours, and he's not satisfied... I mean, why is Hesham doing this?
- **AK:** It's also a past thing...
- **S:** The least word: "I'm Hesham Talaat... I'm Hesham Talaat..." Okay, Sir, my respects to Hesham Talaat... It doesn't mean that you're Hesham, مرتب... But I'm also a daughter of good people.
- **AK:** Uh-huh.
- **S:** I mean, okay, you're Hesham Talaat, God gave you... It's not for you to use it to oppress the weak.
- **AK:** Uh-huh.
- **S:** I came to you with a problem... You're creating a worse problem.
- **S:** For you, Hesham, to do this to us... You?... With your own hand... You... You... You, the one I'm carrying, I put you in front of the whole world... And I made you in front of the whole world... You... I swear to God, until this moment, I haven't opened the phone and told Dad what happened... To protect him.
- **AK:** No, and don't make the issues bigger...
- **S:** I don't want to make it bigger, but the issue is big... The issue is big... The issue is big.
- **AK:** May God protect you, and may the matter be resolved... Let me, I'll call you in a bit.
- **S:** (Speaking about HTM): He says I want to jail you. He sent the police to jail me. He threatens me. I told him, "I did nothing to you? Why?"
  *(to AK) you knew I told him I do not want you. How many times?
- **AK:** Yes, yes.
- **S:** You mediated many times between us.
  - **AK:** Let me, I will call you.

**Call 2 (Suzan Tamim and Abdelkhalek Khoja):**

- **S:** (Referring to HTM) Why threatening me? I told him: What did I do to you? Why such injustice?
- **AK:** I know.
- **S:** He threatens me. Why threatening me? I am just a woman!
- **AK:** Ok. Let me call you back.
- **S:** Okay. Good bye.

**Call 3 (Suzan Tamim and Abdelkhalek Khoja):**

- **S:** (Speaking about HTM) And if he has money, Khalil tells me, we have our dignity, which is more precious to us than all the treasures of the world, and that's what's left for us, and I'm a woman worth six hundred men, and he knows that very well, I'm worth a million men. I didn't let him touch a hair on my head, how long have I been with him? I'm a woman worth a million men.
- **AK:** Yes.
- **S:** So he shouldn't think that the world is loose.
- **AK:** Look, look, my lady, what are your instructions? Tell me.
- **(AK):** (Speaking about Khalil, Suzan's brother): Hesham didn't do anything to him.
- **S:** Oh my God, I have lived, swearing to God...
- **(AK):** I swear to God, I know this. I swear...
- **S:** All my life I destroy it to say no for anything wrong.
- **(AK):** All this is God's will; God is the witness here.
- **S:** He wants to jail me through police.
- **S:** Why would I go to his place?
- **S:** I told him: Khalil, you told Hesham I am not going, and the driver was there, everyone listened to the threats.
- **S:** (Speaking about HTM) Khalil asks, "Who are these people following us? What's wrong with them?" I told him, "Khalil, maybe Hesham wants to make sure we're okay." He said, "That's not reasonable." He went closer to Walid (one of HTM's men) and parked. I swear to God, I didn't open up to Walid anymore... He got closer and parked behind Walid. He found Walid had gotten out and was pretending to do what, now...that filthy one... circling around the car... What are these filthy moves? We turned around in front of him, oh Khalil... I told him, "Never mind, let's go back, what happened?"... Walid got closer to our car... Khalil thought it had broken down... What's wrong with him?... Did something happen to him?... So Khalil says to him, "Is there anything wrong, Walid?" He says to him, "No, I hit a car." He said, "Okay, why did you hit a car?" He said, "Okay..." With all politeness and good manners... Khalil is not impolite... Then he told me, "Look, I suspect the man is up to something... It's not about touching a car... And every now and then I notice that he doesn't mean to drive slowly..." I told Khalil, "Leave it, it won't make a difference..." So Khalil said to me, "Look, I'll show you." Khalil went and waited for him so... Walid remained standing in the middle of the bridge... Then Hesham calls me and threatens me.

**End of Supplementary File)**
